# Supplementary material for: Control of hard block segments of methacrylate-based triblock copolymers for enhanced electromechanical performance
Source: Royal Society of Chemistry journal article supplement (doi:10.1039/c6py01868h), 2016-01-01
Supplement: c6py01868h1.pdf [file c6py01868h1.pdf]

Supplementary Information for:

## **Control of Hard Block Segments of Methacrylate-based Triblock Copolymers for Enhanced Electromechanical Performance**

Kie Yong Cho,<sup>a,b</sup> Ara Cho,<sup>a</sup> Hyun-Ji Kim,<sup>a</sup> Sang-Hee Park,<sup>a</sup> Chong Min Koo,<sup>a</sup> Young Je Kwark,<sup>c</sup> Ho Gyu Yoon,<sup>b</sup> Seung Sang Hwang<sup>a,d</sup> and Kyung-Youl Baek<sup>a,d,\*</sup>

<sup>a</sup> *Materials Architecting Research Center, Korea Institute of Science and Technology, Seoul 02792, Korea.*

<sup>b</sup> *Department of Materials Science and Engineering, Korea University, Seoul 02841, Korea.*

<sup>c</sup> *Department of Organic Materials and Fiber Engineering, Soongsil University, Seoul 156-743, Korea.*

<sup>d</sup> *Nanomaterials Science and Engineering, University of Science and Technology, Daejeon 34113, Korea.*

Corresponding Author E-mail: [baek@kist.re.kr](mailto:baek@kist.re.kr) (K. -Y. Baek)

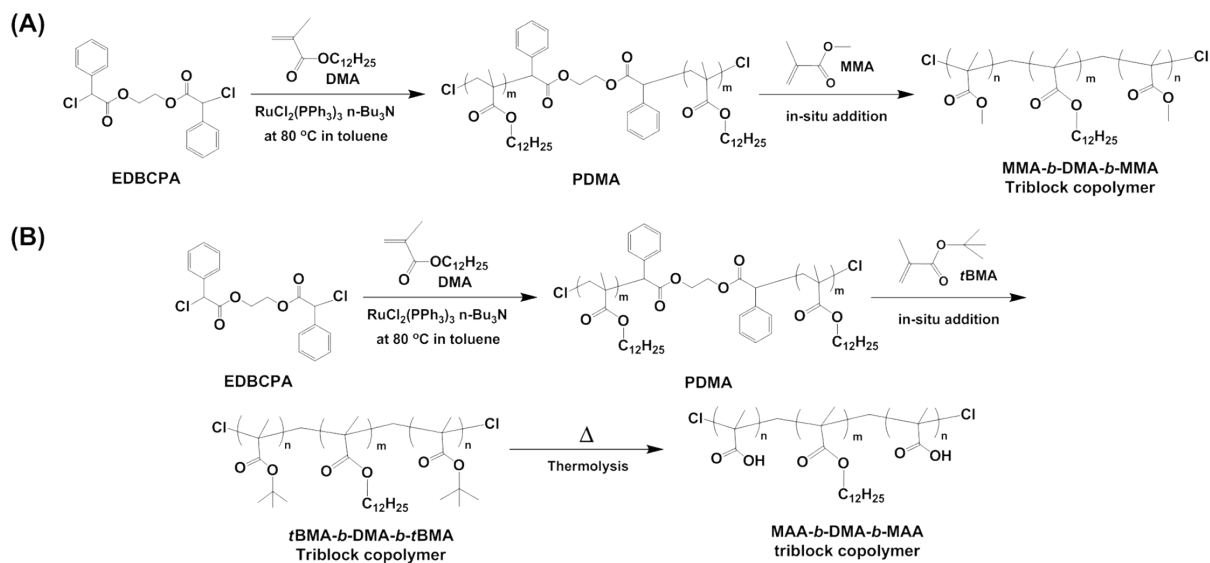

**Scheme S1.** Synthesis of (A) MMA-*b*-DMA-*b*-MMA (PMDM) and (B) *t*BMA-*b*-DMA-*b*-*t*BMA (PTDT) triblock copolymers by sequential living radical polymerization, employing EDBCPA difunctional initiator coupled with Ru-catalyst and  $\text{Bu}_3\text{N}$ . The thermolysis of PTDT at 200 °C introduces acid groups into the hard block segment of the triblock copolymer leading to MAA-*b*-DMA-*b*-MAA (PADA) in (B) bottom.

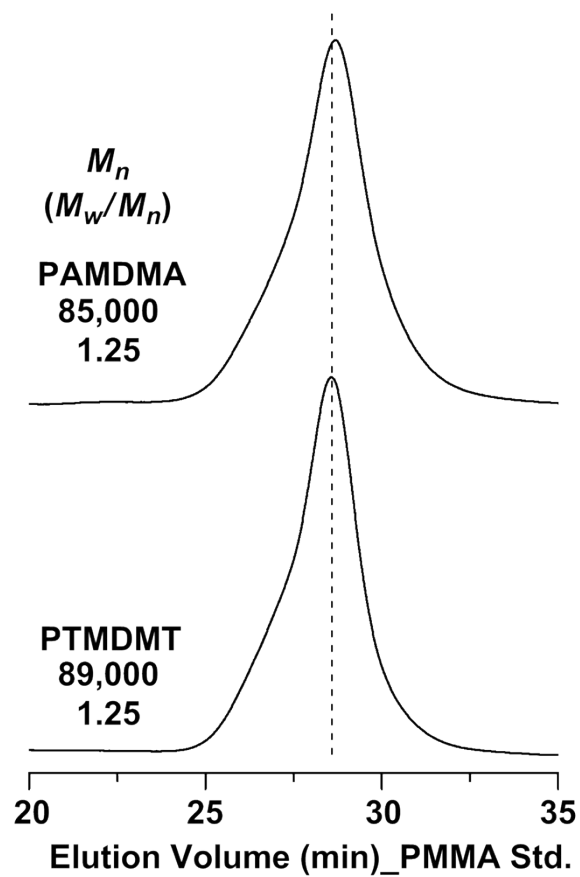

**Fig. S1** SEC curves of PTMDMT and PAMDMA measured in THF eluent.

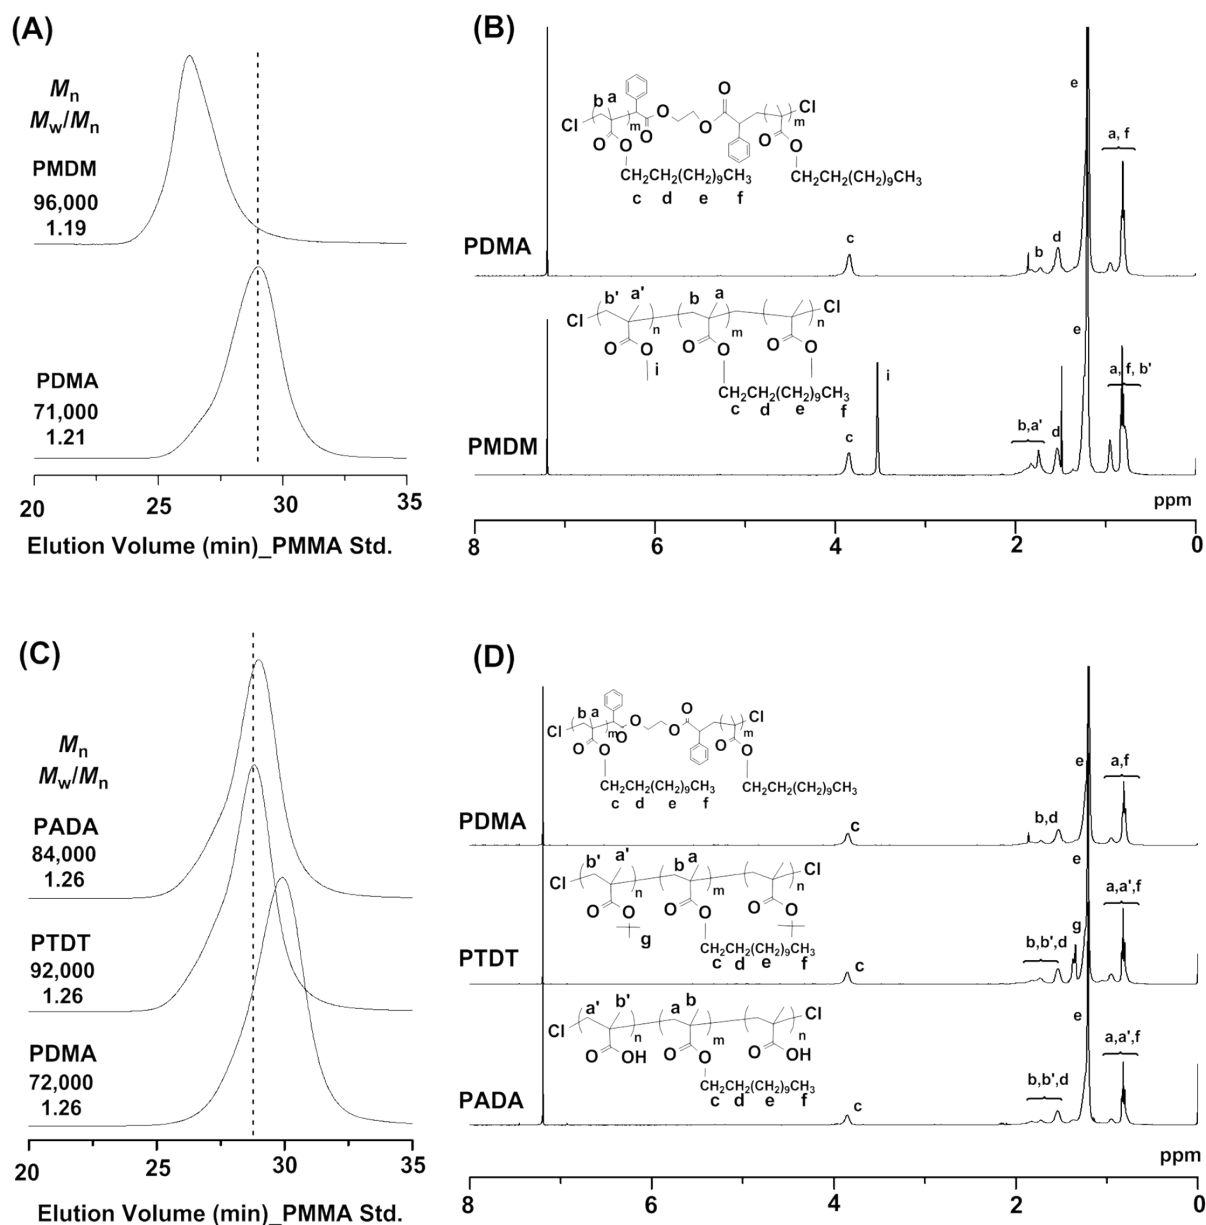

**Fig. S2** (A) SEC curves and (B)  $^1\text{H}$  NMR spectra of PDMA and PMDM, (C) SEC curves and (D)  $^1\text{H}$  NMR spectra of PDMA, PTDT, and PADA. SEC measurement is conducted in THF eluent.  $^1\text{H}$  NMR measurement is performed at room temperature in  $\text{CDCl}_3$ .

The PMDM and PTDT triblock copolymer with PDMA macroinitiator were investigated for its molecular weight and MWD by the use of SEC measurement in Fig. S2 (A) and (C).  $^1\text{H}$  NMR spectra of PMDM and PTDT were shown in Fig. S2 (B) and (D). The results from SEC curves and  $^1\text{H}$  NMR spectra demonstrated that this Ru based ATRP system properly suited for PMDM and PTDT copolymerization. Thermolysis of PTDT was performed at 200 °C for 60 min to dissociate the *tert*-butyl group of *t*BMA units leading to generating PADA

triblock copolymer. This result was evaluated by measuring SEC in Fig. S2 (C). The number averaged molecular weight of PADA ( $M_n = 84,000$ ) was a little decreased in comparison to that of PTDT ( $M_n = 92,000$ ) because of loss of *tert*-butyl groups.  $^1\text{H}$  NMR spectrum of PADA in Fig. S2 (D) exhibited clear peak disappearance at 1.35 ppm (*g*) originated from *tert*-butyl groups of PTDT indicating that thermolysis condition at 200 °C for 60 min was effective to generate PADA triblock copolymer.

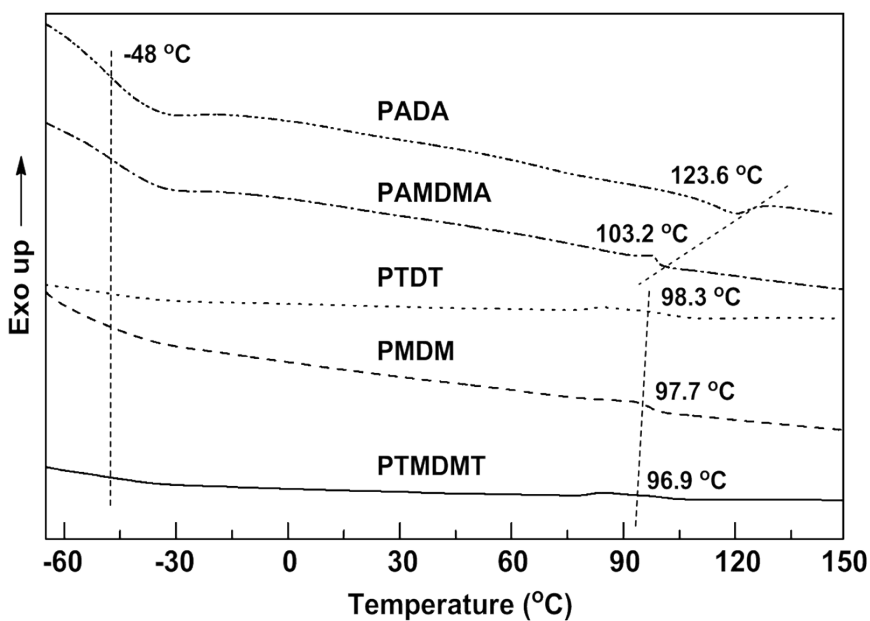

**Fig. S3** DSC curves of PTMDMT3, PMDM, PTDT, PAMDMA3, and PADA measured in the temperature range from -70 °C to 150 °C (1<sup>st</sup> run curves).

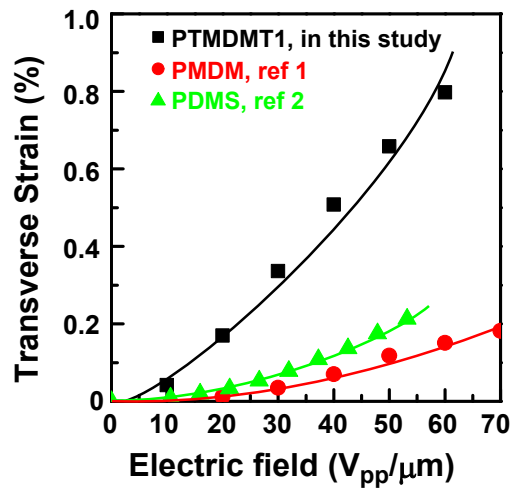

**Fig. S4** Transverse strain changes as a function of electric field: PTMDMT, PMDM,<sup>1</sup> and PDMS.<sup>2</sup>

## References

- 1 K. Y. Cho, S. S. Hwang, H. G. Yoon and K. -Y. Baek, *J. Polym. Sci., Part A: Polym. Chem.*, 2013, **51**, 1924.
- 2 I. J. Kim, K. Min, H. Park, S. M. Hong, W. N. Kim, S. H. Kang and C. M. Koo, *J. Appl. Polym. Sci.*, 2014, **131**, 40030.
